# Supplementary material for: COVID-19 Mortality in California Based on Death Certificates: Disproportionate Impacts Across Racial/Ethnic Groups and Nativity
Source: bioRxiv or medRxiv preprint supplement (doi:10.1101/2021.03.01.21252678), 2021-03-03
Supplement: Supplementary file [file media-1.pdf]

## SUPPLEMENTARY ONLINE CONTENT

Garcia E, Eckel SP, Chen Z, Li K, and Gilliland FD. COVID-19 Mortality in California Based on Death Certificates: Disproportionate Impacts Across Racial/Ethnic Groups and Nativity.

**eMethods.** Statistical Analysis.

**eFigure 1.** Flow chart depicting algorithm used to identify COVID-19-related deaths.

**eFigure 2.** Weekly COVID-19 mortality in California during the study period calculated as a moving average using a 7-day window.

**eTable 1.** Distribution of selected characteristics among decedents identified as having COVID-19 mortality by period of the epidemic in California, N (%).

**eFigure 3.** Age-standardized mortality rate ratios (MRR) and 95% CI by race/ethnicity and study period.

**eTable 2.** Age-standardized mortality rates (MR) and mortality rate ratios (MRR) by sex, race/ethnicity, and study period. MR are per 100,000 person-years.

**eFigure 4.** Age-standardized mortality rate ratios (MRR) and 95% CI by race/ethnicity for selected counties.

**eTable 3.** Age stratum-specific mortality rates (MR) and mortality rate ratios (MRR) by race/ethnicity and sex. MR are per 100,000 person-years.

**eTable 4.** Proportionate mortality (PM) and proportionate mortality ratio (PMR) by selected characteristics for COVID-19 deaths occurring between March 1 - July 31, 2020 among decedents aged 20 years and older.

**eTable 5.** Proportionate mortality (PM) and proportionate mortality ratio (PMR) by race/ethnicity and age for COVID-19 deaths occurring between March 1 - July 31, 2020 among decedents aged 20 years and older.

**eTable 6.** Proportionate mortality (PM) and proportionate mortality ratio (PMR) by race/ethnicity, age, and educational attainment for COVID-19 deaths occurring between March 1 - July 31, 2020 among decedents aged 20 years and older.

**eFigure 5.** Crude all-cause mortality rate ratios and 95% CI based on 2019 mortality data and population estimates by race/ethnicity and age.

**eTable 7.** Crude all-cause mortality rate ratios for 2019, proportionate mortality ratio (PMR) for COVID-19, and adjusted PMR by race/ethnicity and age. The PMR are for COVID-19 deaths occurring between March 1 - July 31, 2020 among decedents aged 20 years and older.

**eTable 8.** Proportionate mortality (PM) and proportionate mortality ratio (PMR) by ethnicity and nativity combined and age for COVID-19 deaths occurring between March 1 - July 31, 2020 among decedents aged 20 years and older.

This supplementary material has been provided by the authors to give readers additional information about their work.

## **eMethods. Statistical Analysis**

The SE for each individual MR and PM was calculated as follows:  $SE[\ln(MR)] = 1/A^{1/2}$ , where  $A$  is the number of COVID-19 deaths. The standard error for each individual MRR and PMR was calculated as follows:  $SE[\ln(MRR)] = (1/A_1 + 1/A_0 - 1/N_1 - 1/N_0)^{1/2}$ , where  $A_j$  is the number of COVID-19 deaths,  $A_0$  is the number of COVID-19 deaths in the referent group,  $N_1$  is the population (or comparison deaths for PMR) and  $N_0$  is the population for the referent group (or comparison deaths for the referent group for PMR). The 95% CI for each measure of disease or association was calculated as  $95\% CI = measure \pm 1.96 \times SE$ .

**eFigure 1. Flow chart depicting algorithm used to identify COVID-19-related deaths.**

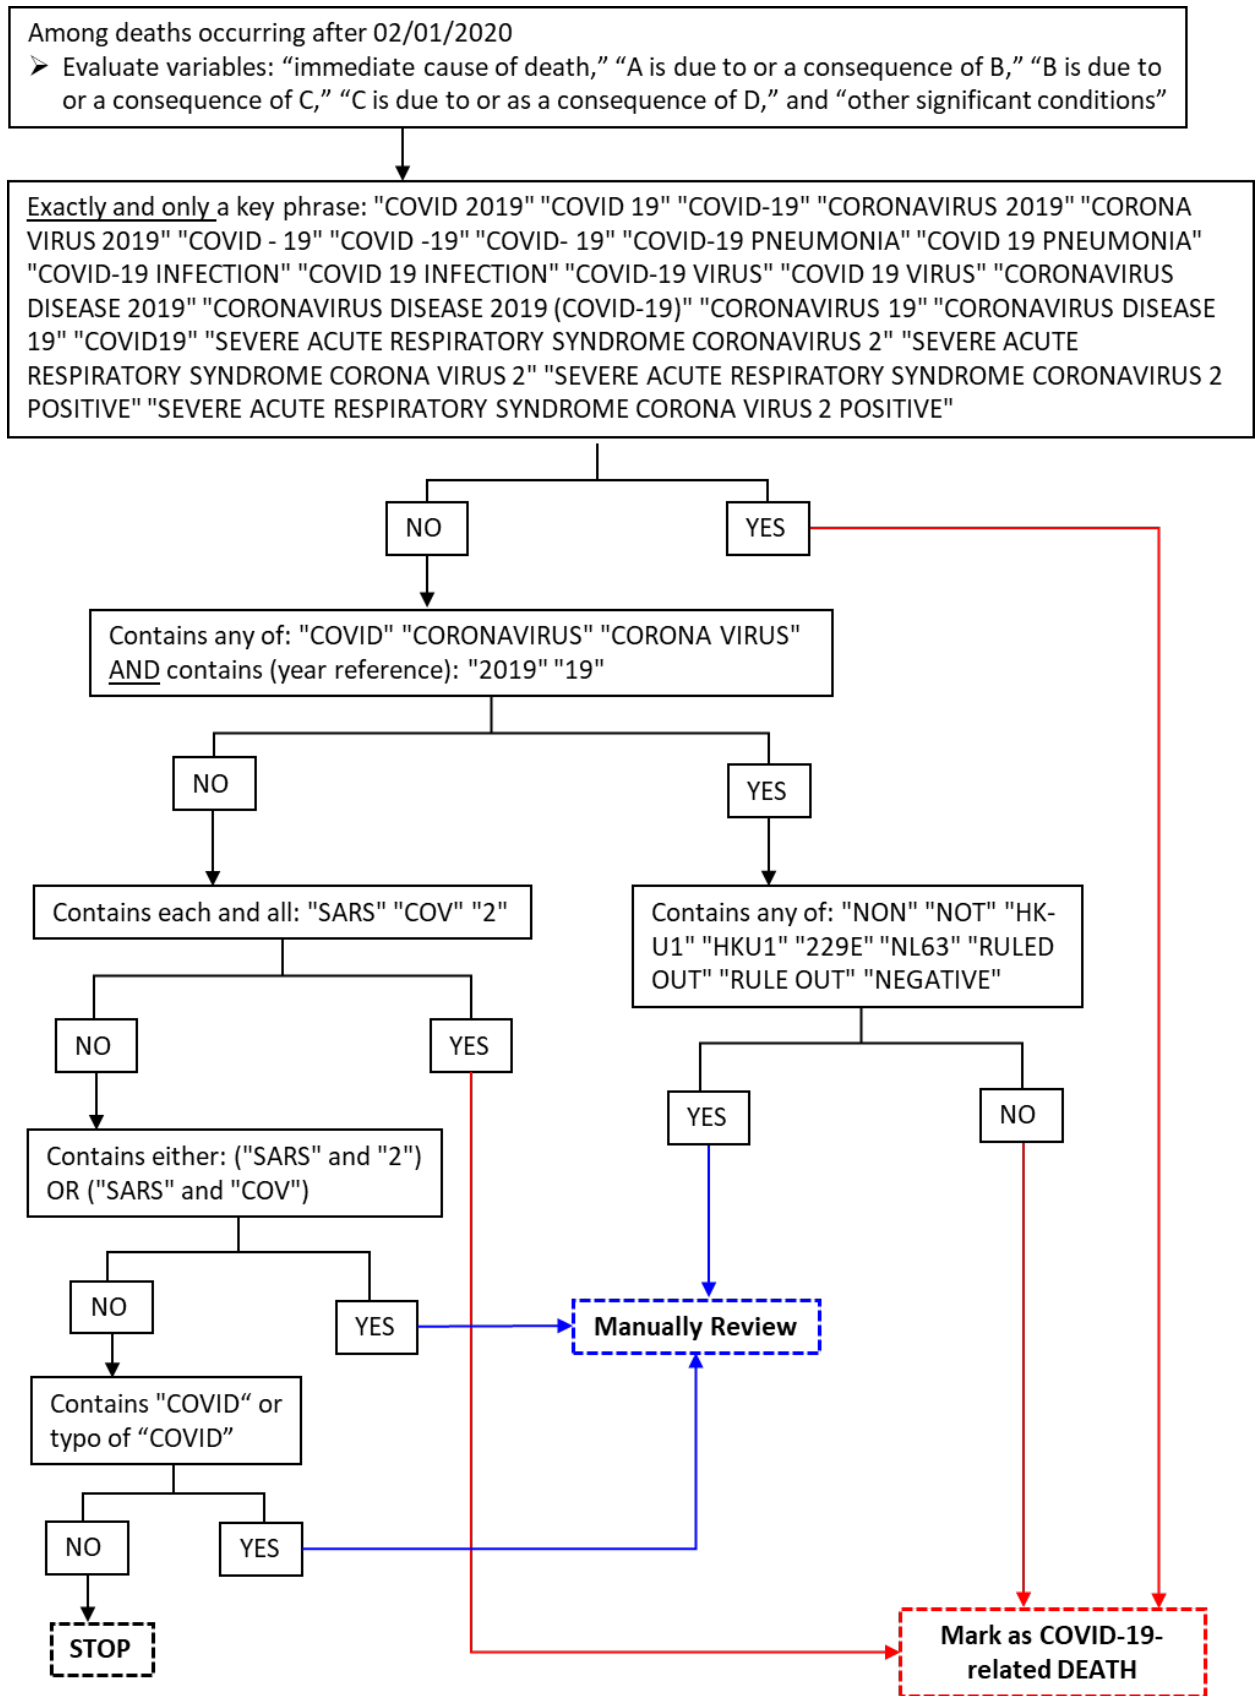

In addition to relying on the code U07.1 as the underlying cause of death or a relevant condition, we searched the following text fields for keywords or combinations of keywords: "immediate cause of death," "A is due to or a consequence of B," "B is due to or a consequence of C," "C is due to or as a

consequence of D,” and “other significant conditions”. For select keywords or combinations of keywords, deaths were manually reviewed by the study team to evaluate if the death was COVID-19 related.

**eFigure 2. Weekly COVID-19 mortality in California during the study period calculated as a moving average using a 7-day window.**

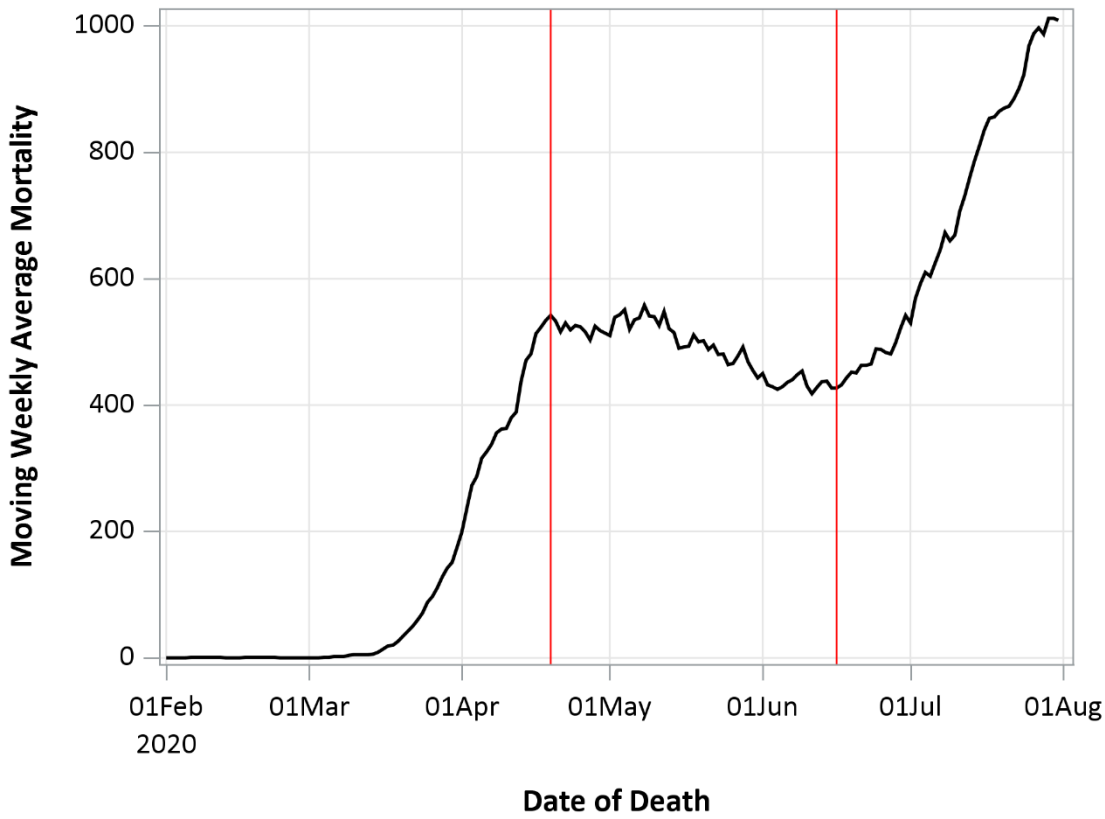

Red vertical lines separate the three periods of the epidemic in California with distinct patterns. Dates of separation are April 19 and June 16, 2020.

**eTable 1. Distribution of selected characteristics among decedents identified as having COVID-19 mortality by period of the epidemic in California, N (%).**

|                                 | <b>Period 1</b>   | <b>Period 2</b>   | <b>Period 3</b>   |
|---------------------------------|-------------------|-------------------|-------------------|
| Date Range                      | 02/06/20-04/19/20 | 04/20/20-06/16/20 | 06/17/20-07/31/20 |
| Deaths                          | 1452              | 4017              | 4731              |
| <b>Age</b>                      |                   |                   |                   |
| 0 to 19                         | 0 (0)             | 1 (0)             | 4 (0.1)           |
| 20 to 44                        | 66 (4.6)          | 123 (3.1)         | 232 (4.9)         |
| 45 to 54                        | 96 (6.6)          | 249 (6.2)         | 365 (7.7)         |
| 55 to 64                        | 175 (12.1)        | 529 (13.2)        | 763 (16.1)        |
| 65 to 74                        | 304 (20.9)        | 838 (20.9)        | 1080 (22.8)       |
| 75 to 84                        | 369 (25.4)        | 986 (24.6)        | 1095 (23.2)       |
| 85 or older                     | 442 (30.4)        | 1291 (32.1)       | 1192 (25.2)       |
| <b>Sex</b>                      |                   |                   |                   |
| Male                            | 861 (59.3)        | 2264 (56.4)       | 2789 (59.0)       |
| Female                          | 591 (40.7)        | 1753 (43.6)       | 1942 (41.1)       |
| <b>Race/ethnicity</b>           |                   |                   |                   |
| Hispanic (Excludes A/PI, AI/AN) | 480 (33.1)        | 1852 (46.1)       | 2582 (54.6)       |
| <i>Mexican</i>                  | 300 (62.5)        | 1217 (65.7)       | 1816 (70.3)       |
| <i>Other Hispanic</i>           | 180 (37.5)        | 635 (34.3)        | 766 (29.7)        |
| NH White                        | 518 (35.7)        | 1191 (29.7)       | 1316 (27.8)       |
| Asian/Pacific Islander          | 251 (17.3)        | 577 (14.4)        | 462 (9.8)         |
| <i>Filipino</i>                 | 93 (37.1)         | 203 (35.2)        | 145 (31.4)        |
| <i>Chinese</i>                  | 44 (17.5)         | 116 (20.1)        | 91 (19.7)         |
| <i>Korean</i>                   | 49 (19.5)         | 119 (20.6)        | 39 (8.4)          |
| <i>Vietnamese</i>               | 21 (8.4)          | 38 (6.6)          | 38 (8.2)          |
| <i>Japanese</i>                 | 16 (6.4)          | 35 (6.1)          | 31 (6.7)          |
| <i>Other Asian</i>              | 28 (11.2)         | 66 (11.4)         | 118 (25.5)        |
| Black                           | 175 (12.1)        | 334 (8.3)         | 295 (6.2)         |
| Multiracial/Other/Unknown       | 19 (1.3)          | 51 (1.3)          | 54 (1.1)          |
| American Indian/Alaskan Native  | 9 (0.6)           | 12 (0.3)          | 22 (0.5)          |
| <b>Educational Attainment</b>   |                   |                   |                   |
| Less than High School           | 345 (23.8)        | 1416 (35.3)       | 1876 (39.7)       |
| High School                     | 455 (31.3)        | 1188 (29.6)       | 1384 (29.3)       |
| Some college                    | 177 (12.2)        | 373 (9.3)         | 490 (10.4)        |
| Associate Degree                | 86 (5.9)          | 182 (4.5)         | 210 (4.4)         |
| Bachelor's Degree               | 199 (13.7)        | 388 (9.7)         | 379 (8.0)         |
| Graduate Degree                 | 110 (7.6)         | 198 (4.9)         | 191 (4.0)         |
| Unknown                         | 80 (5.5)          | 272 (6.8)         | 201 (4.3)         |
| <b>Country of Birth</b>         |                   |                   |                   |
| United States                   | 710 (48.9)        | 1644 (40.9)       | 2059 (43.5)       |
| Mexico                          | 246 (16.9)        | 1083 (27.0)       | 1613 (34.1)       |
| Philippines                     | 98 (6.8)          | 203 (5.1)         | 141 (3.0)         |
| El Salvador                     | 46 (3.2)          | 149 (3.7)         | 169 (3.6)         |
| Guatemala                       | 23 (1.6)          | 104 (2.6)         | 92 (1.9)          |
| South Korea                     | 49 (3.4)          | 111 (2.8)         | 35 (0.7)          |
| Other country                   | 239 (16.5)        | 561 (14.0)        | 502 (10.6)        |
| Unknown                         | 41 (2.8)          | 162 (4.0)         | 120 (2.5)         |

eFigure 3. Age-standardized mortality rate ratios (MRR) and 95% CI by race/ethnicity and study period.

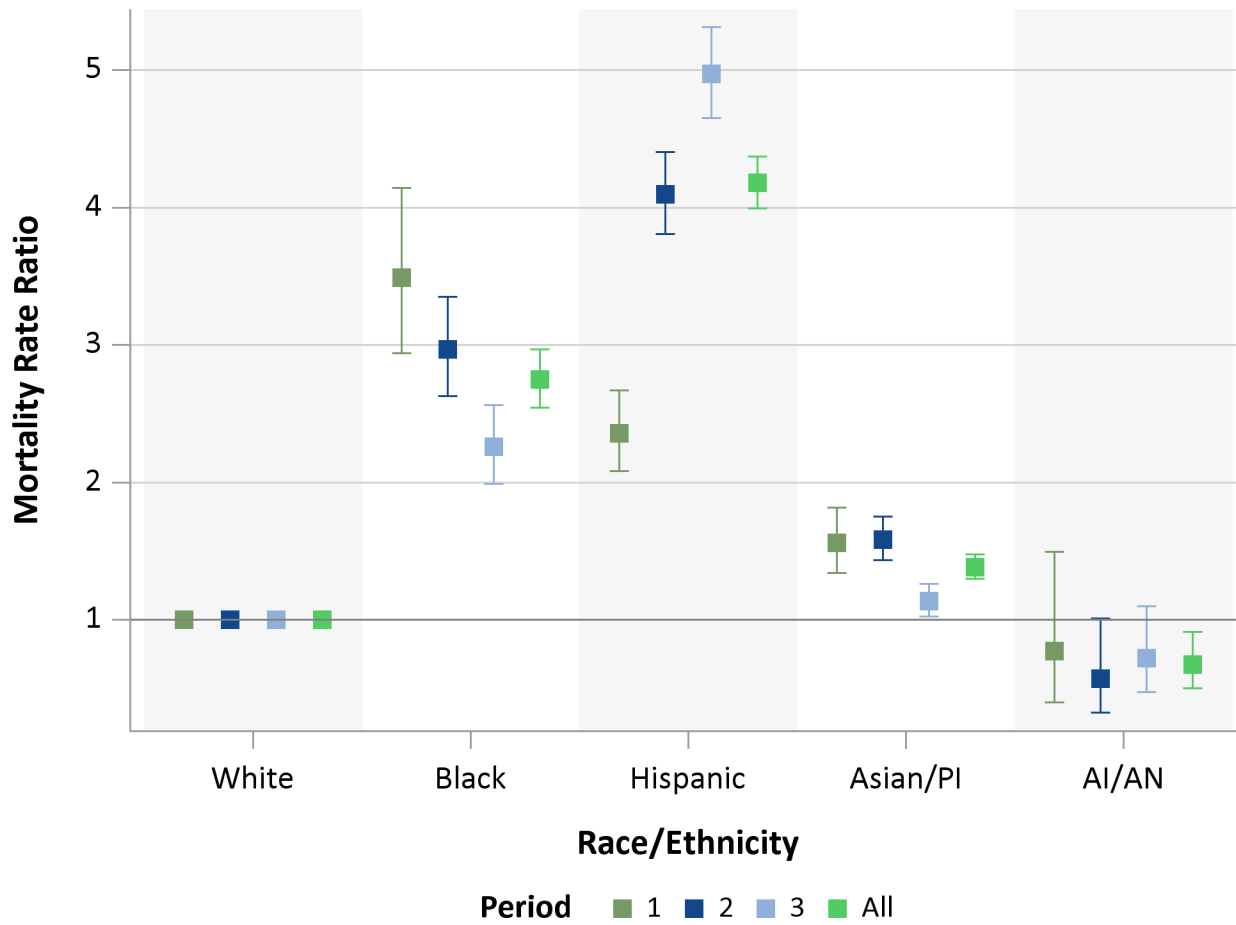

Referent group is non-Hispanic Whites.

**eTable 2. Age-standardized mortality rates (MR) and mortality rate ratios (MRR) by sex, race/ethnicity, and study period. MR are per 100,000 person-years.**

| Sex    | Race/ethnicity | Entire Study Period |                     |                  | Period 1        |                  |                  | Period 2        |                     |                  | Period 3        |                     |                  |
|--------|----------------|---------------------|---------------------|------------------|-----------------|------------------|------------------|-----------------|---------------------|------------------|-----------------|---------------------|------------------|
|        |                | COVID-19 Deaths     | MR (95% CI)         | MRR (95% CI)     | COVID-19 Deaths | MR (95% CI)      | MRR (95% CI)     | COVID-19 Deaths | MR (95% CI)         | MRR (95% CI)     | COVID-19 Deaths | MR (95% CI)         | MRR (95% CI)     |
| All    | White          | 3025                | 27.5 (26.5-28.5)    | Referent         | 518             | 11.0 (10.1-12)   | Referent         | 1191            | 34.1 (32.2-36.0)    | Referent         | 1316            | 49.4 (46.8-52.1)    | Referent         |
|        | Black          | 804                 | 75.4 (70.4-80.8)    | 2.75 (2.54-2.97) | 175             | 38.3 (33.0-44.4) | 3.49 (2.94-4.14) | 334             | 101.1 (90.8-112.5)  | 2.97 (2.63-3.35) | 295             | 111.5 (99.4-124.9)  | 2.26 (1.99-2.56) |
|        | Hispanic       | 4914                | 114.7 (111.6-118.0) | 4.18 (3.99-4.37) | 480             | 25.9 (23.6-28.3) | 2.36 (2.08-2.67) | 1852            | 139.5 (133.3-146.0) | 4.10 (3.81-4.41) | 2582            | 245.4 (236.1-255.1) | 4.97 (4.65-5.31) |
|        | Asian/PI       | 1290                | 38.0 (36.0-40.1)    | 1.38 (1.30-1.48) | 251             | 17.1 (15.1-19.4) | 1.56 (1.34-1.82) | 577             | 54.0 (49.7-58.5)    | 1.58 (1.43-1.75) | 462             | 56.1 (51.2-61.4)    | 1.14 (1.02-1.26) |
|        | AI/AN          | 43                  | 18.6 (13.8-25.0)    | 0.68 (0.50-0.91) | 9               | -                | -                | 12              | -                   | -                | 22              | 35.5 (23.4-53.9)    | 0.72 (0.47-1.10) |
| Female | White          | 1386                | 25.0 (23.7-26.4)    | Referent         | 202             | 8.4 (7.3-9.7)    | Referent         | 582             | 33.1 (30.5-35.9)    | Referent         | 602             | 45.0 (41.6-48.8)    | Referent         |
|        | Black          | 373                 | 68.1 (61.5-75.3)    | 2.72 (2.43-3.05) | 79              | 33.9 (27.2-42.3) | 4.02 (3.10-5.22) | 161             | 94.8 (81.2-110.6)   | 2.86 (2.41-3.41) | 133             | 97.0 (81.8-114.9)   | 2.15 (1.78-2.60) |
|        | Hispanic       | 1827                | 87.7 (83.8-91.8)    | 3.51 (3.27-3.76) | 175             | 19.2 (16.5-22.2) | 2.27 (1.86-2.78) | 700             | 109.0 (101.2-117.4) | 3.29 (2.95-3.68) | 952             | 185.5 (174.1-197.7) | 4.12 (3.72-4.56) |
|        | Asian/PI       | 632                 | 36.4 (33.7-39.4)    | 1.46 (1.33-1.60) | 120             | 16.0 (13.4-19.2) | 1.90 (1.52-2.38) | 289             | 53.0 (47.2-59.5)    | 1.60 (1.39-1.84) | 223             | 52.7 (46.3-60.1)    | 1.17 (1.00-1.37) |
|        | AI/AN          | 22                  | 20.2 (13.3-30.7)    | 0.81 (0.53-1.23) | 8               | -                | -                | 3               | -                   | -                | 11              | -                   | -                |
| Male   | White          | 1639                | 29.6 (28.2-31.1)    | Referent         | 316             | 13.4 (12.0-14.9) | Referent         | 609             | 34.8 (32.1-37.6)    | Referent         | 714             | 53.2 (49.5-57.3)    | Referent         |
|        | Black          | 431                 | 84.2 (76.6-92.6)    | 2.84 (2.55-3.16) | 96              | 43.3 (35.4-52.9) | 3.24 (2.58-4.07) | 173             | 109.1 (94.0-126.6)  | 3.14 (2.65-3.72) | 162             | 128.4 (110.1-149.8) | 2.41 (2.03-2.86) |
|        | Hispanic       | 3087                | 143.4 (138.5-148.6) | 4.84 (4.56-5.14) | 305             | 33.0 (29.5-36.9) | 2.47 (2.11-2.89) | 1152            | 172.0 (162.4-182.3) | 4.95 (4.49-5.46) | 1630            | 308.7 (294.1-324.1) | 5.80 (5.31-6.33) |
|        | Asian/PI       | 658                 | 40.3 (37.4-43.5)    | 1.36 (1.24-1.49) | 131             | 18.7 (15.8-22.2) | 1.40 (1.14-1.72) | 288             | 55.8 (49.7-62.6)    | 1.61 (1.40-1.85) | 239             | 60.5 (53.3-68.6)    | 1.14 (0.98-1.31) |
|        | AI/AN          | 21                  | 16.9 (11.0-26.0)    | 0.57 (0.37-0.88) | 1               | -                | -                | 9               | -                   | -                | 11              | -                   | -                |

Estimates for MR and MRR suppressed where COVID-19 deaths are less than 20.

eFigure 4. Age-standardized mortality rate ratios (MRR) and 95% CI by race/ethnicity for selected counties.

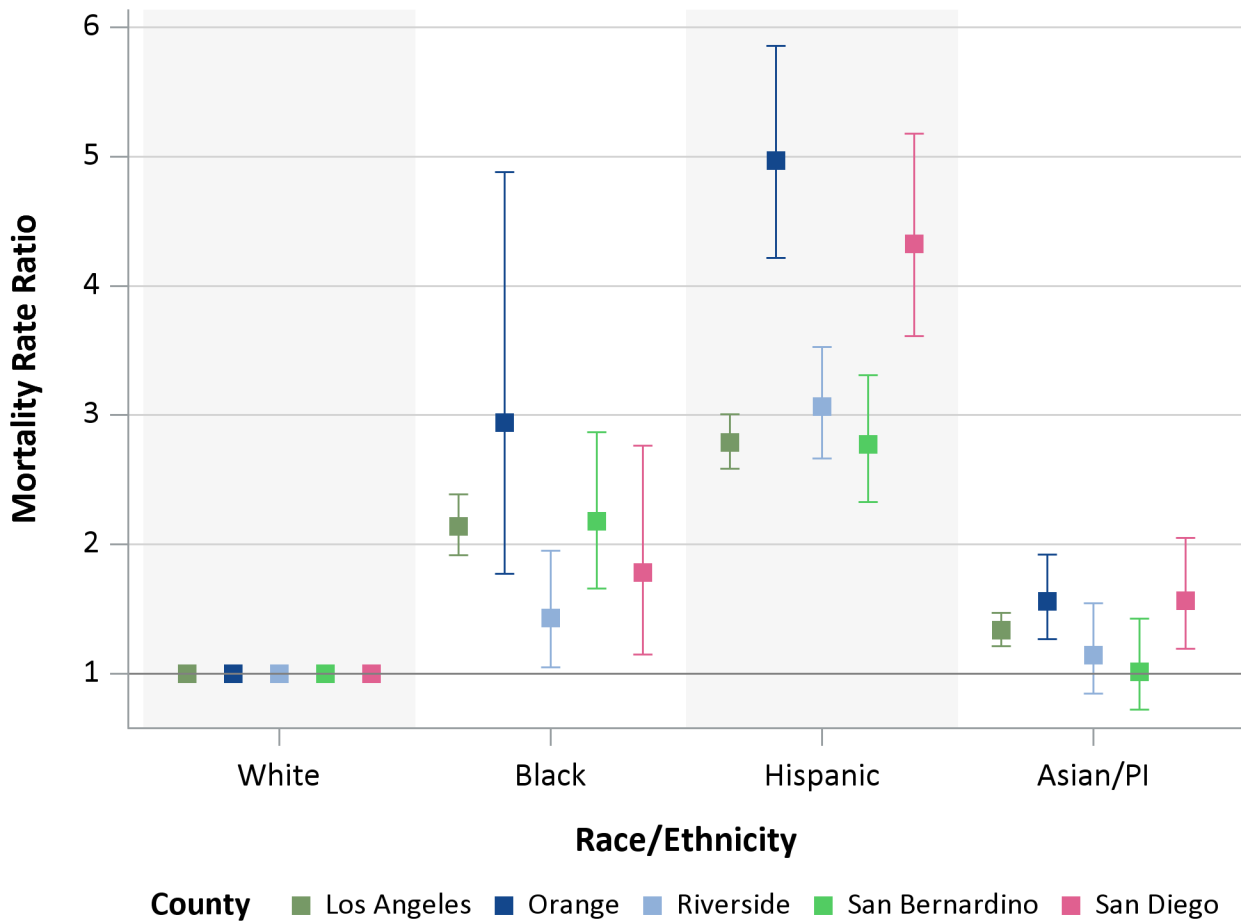

Referent group is non-Hispanic Whites.



**eTable 3. Age stratum-specific mortality rates (MR) and mortality rate ratios (MRR) by race/ethnicity and sex. MR are per 100,000 person-years.**

| Race/<br>ethnicity | Age      | All                |                        |                   | Females            |                        |                   | Males              |                        |                   |
|--------------------|----------|--------------------|------------------------|-------------------|--------------------|------------------------|-------------------|--------------------|------------------------|-------------------|
|                    |          | COVID-19<br>Deaths | MR (95% CI)            | MRR (95% CI)      | COVID-19<br>Deaths | MR (95% CI)            | MRR (95% CI)      | COVID-19<br>Deaths | MR (95% CI)            | MRR (95% CI)      |
| White              | 20 to 54 | 104                | 2.9 (2.4-3.6)          | Referent          | 30                 | 1.8 (1.2-2.5)          | Referent          | 74                 | 4.0 (3.2-5.1)          | Referent          |
|                    | 55 to 64 | 242                | 21.0 (18.5-23.8)       | Referent          | 81                 | 14.0 (11.3-17.4)       | Referent          | 161                | 28.0 (24.0-32.7)       | Referent          |
|                    | 65 to 74 | 557                | 59.3 (54.6-64.4)       | Referent          | 184                | 37.4 (32.4-43.2)       | Referent          | 373                | 83.2 (75.1-92.0)       | Referent          |
|                    | 75 to 84 | 885                | 181.1 (169.6-193.5)    | Referent          | 385                | 143.3 (129.7-158.4)    | Referent          | 500                | 227.2 (208.1-248.0)    | Referent          |
|                    | 85+      | 1236               | 558.5 (528.2-590.5)    | Referent          | 705                | 512.5 (476.0-551.7)    | Referent          | 531                | 634.1 (582.4-690.4)    | Referent          |
| Black              | 20 to 54 | 80                 | 13.8 (11.1-17.1)       | 4.68 (3.50-6.26)  | 27                 | 9.5 (6.5-13.8)         | 5.37 (3.19-9.04)  | 53                 | 17.8 (13.6-23.4)       | 4.43 (3.11-6.30)  |
|                    | 55 to 64 | 126                | 82.3 (69.1-98)         | 3.92 (3.16-4.86)  | 47                 | 59.2 (44.4-78.7)       | 4.23 (2.95-6.06)  | 79                 | 107.2 (86.0-133.6)     | 3.82 (2.92-5.00)  |
|                    | 65 to 74 | 196                | 211.1 (183.5-242.8)    | 3.56 (3.03-4.19)  | 73                 | 142.0 (112.9-178.6)    | 3.80 (2.89-4.98)  | 123                | 297.3 (249.2-354.8)    | 3.58 (2.92-4.38)  |
|                    | 75 to 84 | 219                | 480.5 (420.9-548.5)    | 2.65 (2.29-3.08)  | 117                | 433.5 (361.7-519.7)    | 3.02 (2.46-3.72)  | 102                | 548.7 (451.9-666.2)    | 2.41 (1.95-2.99)  |
|                    | 85+      | 183                | 1057.9 (915.2-1222.8)  | 1.89 (1.62-2.21)  | 109                | 951.7 (788.8-1148.2)   | 1.86 (1.52-2.27)  | 74                 | 1265.8 (1007.9-1589.7) | 2.00 (1.57-2.54)  |
| Hispanic           | 20 to 54 | 854                | 24.9 (23.3-26.7)       | 8.48 (6.92-10.39) | 245                | 14.7 (13.0-16.7)       | 8.34 (5.71-12.18) | 609                | 34.6 (32.0-37.5)       | 8.58 (6.74-10.92) |
|                    | 55 to 64 | 954                | 152.4 (143.0-162.4)    | 7.26 (6.30-8.36)  | 260                | 81.2 (71.9-91.7)       | 5.81 (4.52-7.45)  | 694                | 227.1 (210.8-244.7)    | 8.10 (6.82-9.62)  |
|                    | 65 to 74 | 1190               | 349.7 (330.4-370.1)    | 5.90 (5.33-6.52)  | 391                | 211.1 (191.2-233.1)    | 5.64 (4.74-6.72)  | 799                | 514.6 (480.1-551.5)    | 6.19 (5.47-7.00)  |
|                    | 75 to 84 | 1001               | 636.9 (598.7-677.6)    | 3.52 (3.21-3.85)  | 429                | 466.7 (424.5-513.0)    | 3.26 (2.84-3.74)  | 572                | 877.4 (808.4-952.4)    | 3.86 (3.43-4.35)  |
|                    | 85+      | 912                | 1416.5 (1327.5-1511.5) | 2.54 (2.33-2.76)  | 502                | 1229.4 (1126.4-1341.7) | 2.40 (2.14-2.69)  | 410                | 1741.0 (1580.4-1918.0) | 2.75 (2.41-3.12)  |
| Asian/PI           | 20 to 54 | 78                 | 4.5 (3.6-5.7)          | 1.54 (1.15-2.06)  | 24                 | 2.6 (1.8-3.9)          | 1.50 (0.88-2.57)  | 54                 | 6.6 (5.1-8.6)          | 1.64 (1.16-2.33)  |
|                    | 55 to 64 | 125                | 31.2 (26.1-37.1)       | 1.48 (1.20-1.84)  | 37                 | 16.9 (12.2-23.3)       | 1.21 (0.82-1.78)  | 88                 | 48.3 (39.2-59.6)       | 1.72 (1.33-2.23)  |
|                    | 65 to 74 | 228                | 79.5 (69.8-90.5)       | 1.34 (1.15-1.56)  | 84                 | 52.5 (42.4-65.1)       | 1.40 (1.08-1.82)  | 144                | 113.8 (96.7-134.0)     | 1.37 (1.13-1.66)  |
|                    | 75 to 84 | 302                | 211.5 (188.9-236.7)    | 1.17 (1.02-1.33)  | 130                | 159.7 (134.5-189.7)    | 1.11 (0.91-1.36)  | 172                | 279.8 (240.9-324.9)    | 1.23 (1.04-1.46)  |
|                    | 85+      | 556                | 848.5 (780.8-922)      | 1.52 (1.37-1.68)  | 356                | 870.1 (784.2-965.3)    | 1.70 (1.50-1.93)  | 200                | 812.6 (707.4-933.4)    | 1.28 (1.09-1.51)  |

Results for the Native American/Alaskan Native group not shown due to small numbers.

**eTable 4. Proportionate mortality (PM) and proportionate mortality ratio (PMR) by selected characteristics for COVID-19 deaths occurring between March 1 - July 31, 2020 among decedents aged 20 years and older.**

|                                        | COVID-19 Deaths | PM (95% CI)*     | PMR (95% CI)     |
|----------------------------------------|-----------------|------------------|------------------|
| <b>Sex</b>                             |                 |                  |                  |
| Female                                 | 4283            | 8.2 (8.0-8.4)    | Referent         |
| Male                                   | 5910            | 10.4 (10.2-10.7) | 1.27 (1.22-1.32) |
| <b>Race/Ethnicity</b>                  |                 |                  |                  |
| White                                  | 3024            | 4.5 (4.4-4.7)    | Referent         |
| Black                                  | 804             | 9.7 (9.0-10.4)   | 2.14 (1.98-2.30) |
| Hispanic                               | 4910            | 23.8 (23.1-24.5) | 5.25 (5.03-5.48) |
| Asian/PI                               | 1288            | 11.5 (10.9-12.1) | 2.53 (2.38-2.70) |
| American Indian/Alaskan Native         | 43              | 6.7 (5.0-9.1)    | 1.49 (1.11-1.99) |
| <b>Educational Attainment</b>          |                 |                  |                  |
| Less than High School                  | 3635            | 17.9 (17.3-18.5) | 2.86 (2.70-3.03) |
| High School                            | 3025            | 8.0 (7.7-8.3)    | 1.28 (1.20-1.36) |
| Some college or Associate Degree       | 1516            | 6.2 (5.9-6.5)    | 0.99 (0.92-1.06) |
| Bachelor or Graduate Degree            | 1464            | 6.3 (5.9-6.6)    | Referent         |
| <b>Ethnicity and Nativity Combined</b> |                 |                  |                  |
| U.S.-born non-Hispanic                 | 3271            | 4.7 (4.5-4.9)    | Referent         |
| U.S.-born Hispanic                     | 1137            | 12.0 (11.4-12.8) | 2.56 (2.40-2.72) |
| Foreign-born non-Hispanic              | 1753            | 10.2 (9.7-10.6)  | 2.16 (2.04-2.28) |
| Foreign-born Hispanic                  | 3709            | 33.6 (32.5-34.7) | 7.14 (6.84-7.45) |

\*Sub-population PM were calculated using all-cause mortality in the same sub-population occurring March 1-July 31 in 2016-2019 among decedents aged 20 years and older.

**eTable 5. Proportionate mortality (PM) and proportionate mortality ratio (PMR) by race/ethnicity and age for COVID-19 deaths occurring between March 1 - July 31, 2020 among decedents aged 20 years and older.**

| <b>Race/ethnicity</b>  | <b>Age</b> | <b>COVID-19 Deaths</b> | <b>PM (95% CI)*</b> | <b>PMR (95% CI)</b> |
|------------------------|------------|------------------------|---------------------|---------------------|
| White                  | 20 to 54   | 104                    | 2.0 (1.6-2.4)       | Referent            |
|                        | 55 to 64   | 242                    | 3.1 (2.8-3.5)       | Referent            |
|                        | 65 to 74   | 557                    | 4.6 (4.2-5.0)       | Referent            |
|                        | 75 to 84   | 885                    | 5.5 (5.2-5.9)       | Referent            |
|                        | 85+        | 1236                   | 4.8 (4.6-5.1)       | Referent            |
| Black                  | 20 to 54   | 80                     | 5.4 (4.3-6.7)       | 2.76 (2.07-3.67)    |
|                        | 55 to 64   | 126                    | 7.7 (6.4-9.1)       | 2.45 (1.99-3.02)    |
|                        | 65 to 74   | 196                    | 10.7 (9.3-12.3)     | 2.34 (2.00-2.73)    |
|                        | 75 to 84   | 219                    | 12.6 (11.0-14.3)    | 2.27 (1.97-2.61)    |
|                        | 85+        | 183                    | 11.4 (9.9-13.2)     | 2.37 (2.04-2.74)    |
| Hispanic               | 20 to 54   | 854                    | 18.9 (17.6-20.2)    | 9.62 (7.88-11.74)   |
|                        | 55 to 64   | 953                    | 29.3 (27.5-31.2)    | 9.38 (8.20-10.74)   |
|                        | 65 to 74   | 1190                   | 32.9 (31.1-34.9)    | 7.20 (6.56-7.91)    |
|                        | 75 to 84   | 1001                   | 24.0 (22.6-25.6)    | 4.34 (3.99-4.72)    |
|                        | 85+        | 912                    | 17.9 (16.8-19.1)    | 3.71 (3.42-4.02)    |
| Asian/Pacific Islander | 20 to 54   | 78                     | 6.9 (5.5-8.6)       | 3.53 (2.65-4.70)    |
|                        | 55 to 64   | 125                    | 9.8 (8.2-11.7)      | 3.15 (2.56-3.87)    |
|                        | 65 to 74   | 227                    | 11.9 (10.4-13.5)    | 2.60 (2.24-3.01)    |
|                        | 75 to 84   | 302                    | 10.9 (9.7-12.2)     | 1.96 (1.73-2.22)    |
|                        | 85+        | 556                    | 13.4 (12.4-14.6)    | 2.78 (2.53-3.05)    |

\*Sub-population PM were calculated using all-cause mortality in the same sub-population occurring March 1-July 31 in 2016-2019 among decedents aged 20 years and older.

**eTable 6. Proportionate mortality (PM) and proportionate mortality ratio (PMR) by race/ethnicity, age, and educational attainment for COVID-19 deaths occurring between March 1 - July 31, 2020 among decedents aged 20 years and older.**

| Race/ethnicity         | Age      | High school or less |                  |                  | Some college or more |                  |                  |
|------------------------|----------|---------------------|------------------|------------------|----------------------|------------------|------------------|
|                        |          | COVID-19 Deaths     | PM (95% CI)*     | PMR (95% CI)     | COVID-19 Deaths      | PM (95% CI)*     | PMR (95% CI)     |
| White                  | 20 to 64 | 191                 | 3.0 (2.6-3.4)    | Referent         | 134                  | 2.2 (1.9-2.6)    | Referent         |
|                        | 65 to 74 | 238                 | 4.9 (4.3-5.6)    | Referent         | 268                  | 3.9 (3.5-4.4)    | Referent         |
|                        | 75 to 84 | 407                 | 5.7 (5.2-6.3)    | Referent         | 426                  | 5.0 (4.5-5.5)    | Referent         |
|                        | 85+      | 645                 | 5.1 (4.7-5.5)    | Referent         | 535                  | 4.3 (3.9-4.6)    | Referent         |
| Black                  | 20 to 64 | 115                 | 6.9 (5.7-8.3)    | 2.32 (1.86-2.91) | 83                   | 6.4 (5.1-7.9)    | 2.88 (2.21-3.77) |
|                        | 65 to 74 | 101                 | 11.9 (9.8-14.5)  | 2.43 (1.94-3.03) | 74                   | 8.4 (6.7-10.5)   | 2.14 (1.67-2.75) |
|                        | 75 to 84 | 112                 | 12.5 (10.4-15.1) | 2.18 (1.79-2.66) | 91                   | 11.4 (9.3-14.0)  | 2.28 (1.84-2.83) |
|                        | 85+      | 112                 | 11.8 (9.8-14.2)  | 2.32 (1.92-2.81) | 61                   | 10.1 (7.9-13.0)  | 2.37 (1.84-3.05) |
| Hispanic               | 20 to 64 | 1452                | 25.3 (24.0-26.7) | 8.54 (7.37-9.88) | 292                  | 15.5 (13.9-17.4) | 7.03 (5.76-8.56) |
|                        | 65 to 74 | 966                 | 35.8 (33.6-38.1) | 7.30 (6.39-8.35) | 162                  | 19.9 (17.0-23.2) | 5.09 (4.24-6.09) |
|                        | 75 to 84 | 858                 | 25.8 (24.1-27.6) | 4.49 (4.02-5.02) | 99                   | 13.3 (10.9-16.2) | 2.68 (2.18-3.29) |
|                        | 85+      | 785                 | 18.4 (17.2-19.8) | 3.63 (3.29-4.01) | 83                   | 11.6 (9.4-14.4)  | 2.72 (2.19-3.39) |
| Asian/Pacific Islander | 20 to 64 | 64                  | 6.6 (5.1-8.4)    | 2.22 (1.68-2.92) | 134                  | 9.7 (8.2-11.5)   | 4.38 (3.48-5.53) |
|                        | 65 to 74 | 72                  | 9.1 (7.2-11.5)   | 1.85 (1.44-2.39) | 145                  | 13.4 (11.4-15.8) | 3.43 (2.83-4.15) |
|                        | 75 to 84 | 140                 | 10.4 (8.8-12.3)  | 1.81 (1.51-2.18) | 150                  | 10.9 (9.3-12.8)  | 2.19 (1.83-2.61) |
|                        | 85+      | 344                 | 13.4 (12.1-14.9) | 2.65 (2.34-3.00) | 198                  | 13.1 (11.4-15.0) | 3.07 (2.63-3.58) |

\*Sub-population PM were calculated using all-cause mortality in the same sub-population occurring March 1-July 31 in 2016-2019 among decedents aged 20 years and older.

**eFigure 5. Crude all-cause mortality rate ratios and 95% CI based on 2019 mortality data and population estimates by race/ethnicity and age.**

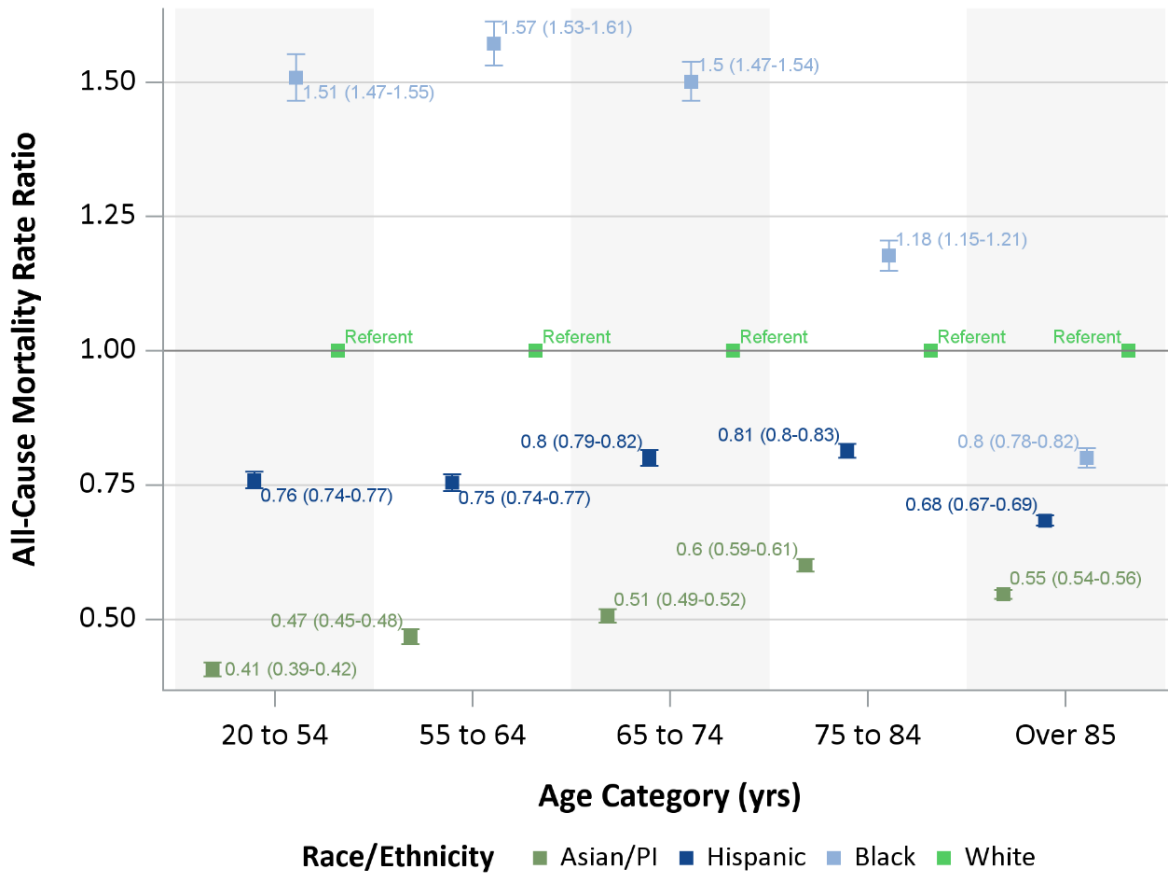

Referent group is non-Hispanic Whites.

**eTable 7. Crude all-cause mortality rate ratios for 2019, proportionate mortality ratio (PMR) for COVID-19, and adjusted PMR by race/ethnicity and age. The PMR are for COVID-19 deaths occurring between March 1 - July 31, 2020 among decedents aged 20 years and older.**

| Race/ethnicity         | Age      | 2019 all-cause mortality rate ratio | PMR  | Adjusted* PMR |
|------------------------|----------|-------------------------------------|------|---------------|
| White                  | 20 to 54 | 1.00                                | 1.00 | 1.00          |
|                        | 55 to 64 | 1.00                                | 1.00 | 1.00          |
|                        | 65 to 74 | 1.00                                | 1.00 | 1.00          |
|                        | 75 to 84 | 1.00                                | 1.00 | 1.00          |
|                        | 85<=     | 1.00                                | 1.00 | 1.00          |
| Black                  | 20 to 54 | 1.51                                | 2.76 | 4.16          |
|                        | 55 to 64 | 1.57                                | 2.45 | 3.85          |
|                        | 65 to 74 | 1.50                                | 2.34 | 3.51          |
|                        | 75 to 84 | 1.18                                | 2.27 | 2.67          |
|                        | 85<=     | 0.80                                | 2.37 | 1.89          |
| Hispanic               | 20 to 54 | 0.76                                | 9.62 | 7.30          |
|                        | 55 to 64 | 0.75                                | 9.38 | 7.08          |
|                        | 65 to 74 | 0.80                                | 7.20 | 5.76          |
|                        | 75 to 84 | 0.81                                | 4.34 | 3.53          |
|                        | 85<=     | 0.68                                | 3.71 | 2.54          |
| Asian/Pacific Islander | 20 to 54 | 0.41                                | 3.53 | 1.44          |
|                        | 55 to 64 | 0.47                                | 3.15 | 1.47          |
|                        | 65 to 74 | 0.51                                | 2.60 | 1.31          |
|                        | 75 to 84 | 0.60                                | 1.96 | 1.18          |
|                        | 85<=     | 0.55                                | 2.78 | 1.52          |

\*PMR were indirectly adjusted for differences in 2019 all-cause mortality by multiplying PMR by the stratum specific all-cause mortality rate ratio.

**eTable 8. Proportionate mortality (PM) and proportionate mortality ratio (PMR) by ethnicity and nativity combined and age for COVID-19 deaths occurring between March 1 - July 31, 2020 among decedents aged 20 years and older.**

| <b>Ethnicity and Nativity Combined</b> | <b>Age</b> | <b>COVID-19 Deaths</b> | <b>PM (95% CI)*</b> | <b>PMR (95% CI)</b> |
|----------------------------------------|------------|------------------------|---------------------|---------------------|
| U.S.-born non-Hispanic                 | 20 to 54   | 182                    | 2.6 (2.3-3.1)       | Referent            |
|                                        | 55 to 64   | 346                    | 3.9 (3.5-4.3)       | Referent            |
|                                        | 65 to 74   | 646                    | 4.9 (4.6-5.3)       | Referent            |
|                                        | 75 to 84   | 931                    | 5.8 (5.4-6.2)       | Referent            |
|                                        | 85<=       | 1166                   | 4.8 (4.5-5.0)       | Referent            |
| U.S.-born Hispanic                     | 20 to 54   | 247                    | 9.7 (8.6-11.0)      | 3.67 (3.04-4.42)    |
|                                        | 55 to 64   | 160                    | 11.2 (9.6-13.1)     | 2.89 (2.42-3.46)    |
|                                        | 65 to 74   | 243                    | 16.5 (14.6-18.7)    | 3.35 (2.92-3.85)    |
|                                        | 75 to 84   | 211                    | 12.9 (11.2-14.7)    | 2.22 (1.93-2.55)    |
|                                        | 85<=       | 276                    | 11.7 (10.4-13.1)    | 2.45 (2.17-2.78)    |
| Foreign-born non-Hispanic              | 20 to 54   | 88                     | 6.9 (5.6-8.5)       | 2.62 (2.04-3.35)    |
|                                        | 55 to 64   | 137                    | 7.7 (6.5-9.1)       | 1.98 (1.64-2.40)    |
|                                        | 65 to 74   | 296                    | 10.6 (9.5-11.9)     | 2.15 (1.89-2.46)    |
|                                        | 75 to 84   | 443                    | 9.9 (9.0-10.8)      | 1.70 (1.53-1.90)    |
|                                        | 85<=       | 789                    | 11.4 (10.6-12.2)    | 2.40 (2.20-2.61)    |
| Foreign-born Hispanic                  | 20 to 54   | 597                    | 30.6 (28.3-33.2)    | 11.59 (9.89-13.57)  |
|                                        | 55 to 64   | 782                    | 43.6 (40.7-46.8)    | 11.25 (10.02-12.64) |
|                                        | 65 to 74   | 924                    | 43.9 (41.2-46.8)    | 8.91 (8.14-9.74)    |
|                                        | 75 to 84   | 778                    | 31.2 (29.1-33.5)    | 5.39 (4.95-5.87)    |
|                                        | 85<=       | 628                    | 23.3 (21.5-25.1)    | 4.89 (4.48-5.34)    |

\*Sub-population PM were calculated using all-cause mortality in the same sub-population occurring March 1-July 31 in 2016-2019 among decedents aged 20 years and older.
